# Supplementary material
Source: PubMed Central journal article supplement (PMC4587441)
Supplement: supp_pp.15.00276_PP2015-00276R2_Supplemental_Material.pdf [file supp_pp.15.00276_PP2015-00276R2_Supplemental_Material.pdf]

## Supplemental Data

### Title: Drought induces distinct growth response, protection and recovery mechanisms in the maize leaf growth zone

**Authors:** Viktoriya Avramova, Hamada AbdElgawad, Zhengfeng Zhang, Bartosz Fotschki, Romina Casadevall, Lucia Vergauwen, Dries Knapen, Edith Taleisnik, Yves Guisez, Han Asard, and Gerrit T.S. Beemster

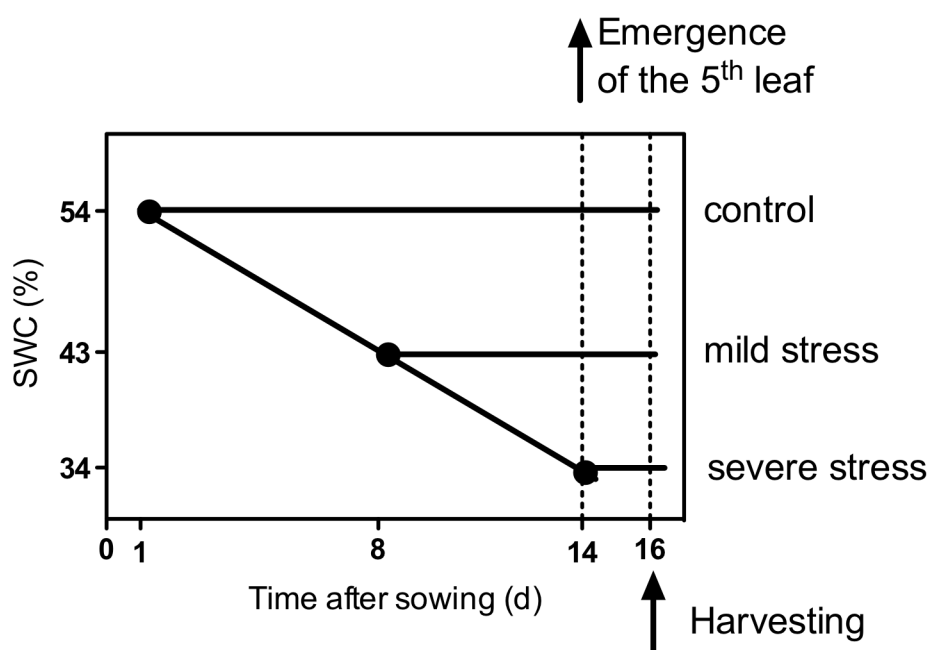

**Figure S1.** Soil Water Content (SWC) During the Growth Experiment. The symbols show the starting point of adding water in order to maintain the same SWC until the end of the experiment. The arrows show the time of emergence of the fifth leaf (when the soil conditions are stable in all treatments) and the time of harvesting and analysis (three days after emergence, during steady-state growth).

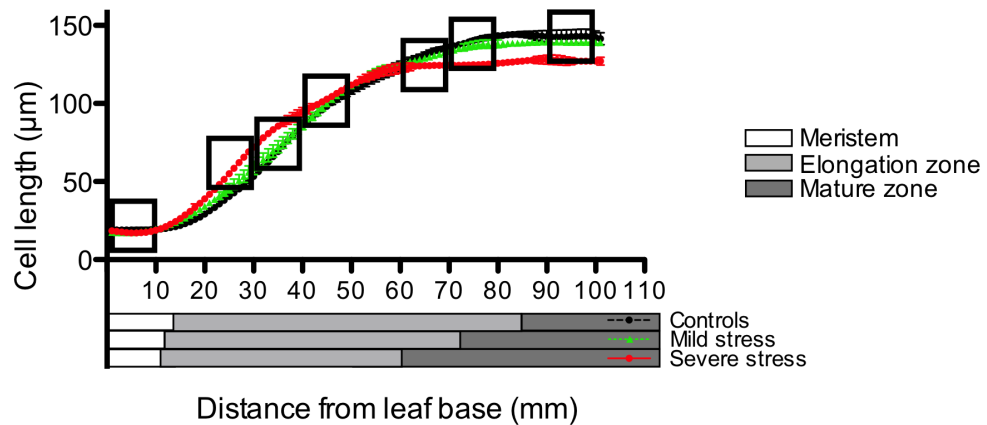

**Figure S2.** The Effect of Drought on the Cell Length Profile. The length of each developmental zone (meristem, elongation, mature) is marked for each condition (control, mild and severe drought stress). The boxes indicate where the sampling for the microarray analysis of equivalent developmental stages was done for each of the treatments. Data are averages  $\pm$  SE (n=5).

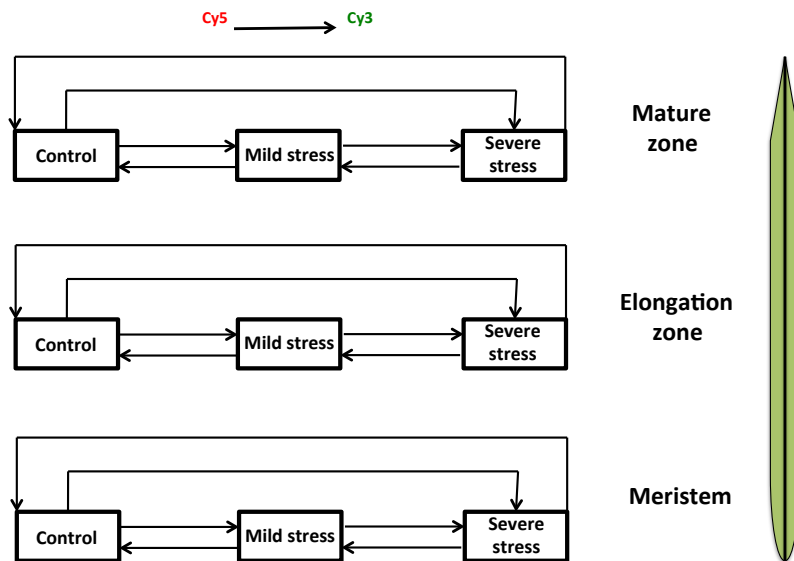

**Figure S3.** Hybridization Design. Three separate hybridization loops, each comprising 6 arrays, were used in order to directly contrast the three treatments (control, mild and severe drought stress) within each of the three zones (meristem, elongation zone and mature zone) of the growing maize leaf 5.

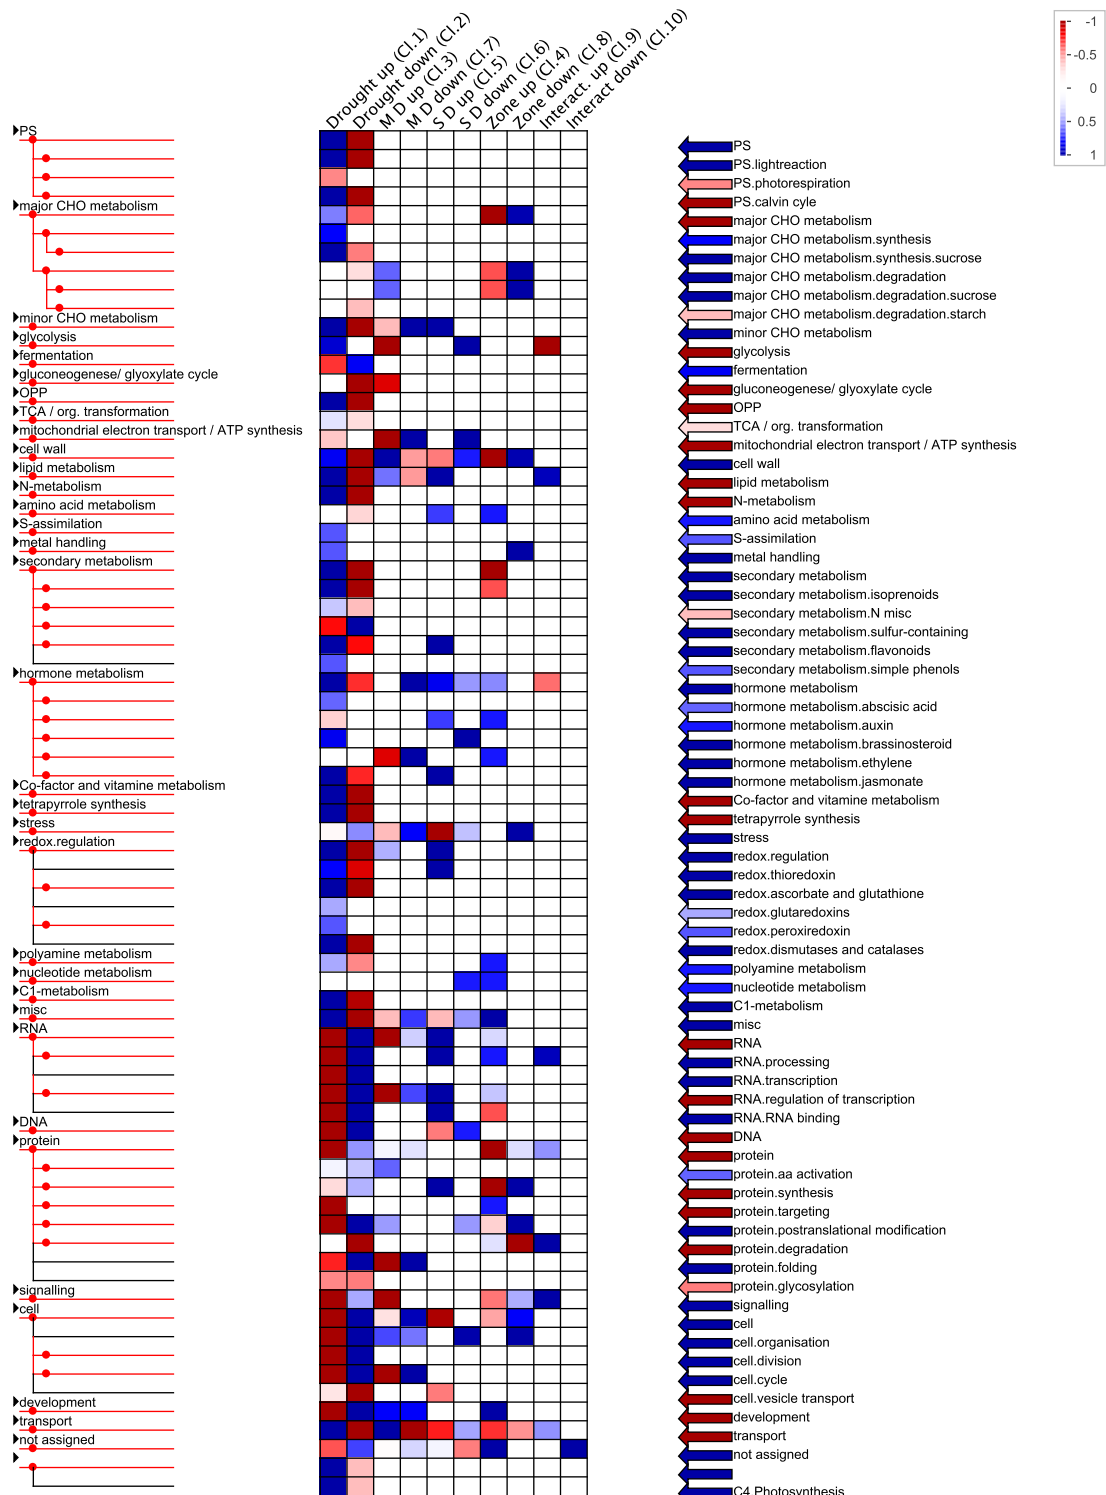

**Figure S4.** Gene Enrichment Analysis. GO categories, enriched among genes specifically affected by the drought stress conditions (clusters 1 and 2), specifically affected by mild drought stress (MD, clusters 3 and 7), and severe drought stress (SD, clusters 5 and 6), differentially expressed between the zones (clusters 4 and 8), and

affected by both stress and zone (clusters 9 and 10), ORA-Fisher test, PageMan. Blue color indicates overrepresentation and red: underrepresentation. The data represents all the significant genes from the two-way ANOVA analysis across all the zones from Fig. 1 A and C and the sample labels include cluster numbers from Fig. 1C (Cl.x).

**Table S1.** An Overview of Core Cell Cycle Genes in Maize. The table contains newly and previously described genes (1- annotated from the current dataset, by combining different databases as <http://www.maizesequence.org>, UNIPROT (<http://www.uniprot.org/>) and Plaza (<http://bioinformatics.psb.ugent.be/plaza/>), 2-Rymen et al. (2007), 3-Kakumanu et al. (2012)). A two-way ANOVA statistical test was applied to compare the gene expression in the three zones of the leaf (meristem, elongation and mature zone), and the three treatments (control, mild stress, severe stress) and the significant changes are marked in bold.

| Zm GeneID     | Gene Name          | Synonym(s)            | EST Accession No.    | Protein Accession number | Agilent ID                   | Above BG level | Log2FC mild stress                         | Log2FC severe stress                       | Source of the gene description |
|---------------|--------------------|-----------------------|----------------------|--------------------------|------------------------------|----------------|--------------------------------------------|--------------------------------------------|--------------------------------|
| GRMZM2G012220 | <i>apc 1</i>       |                       | TC290187             |                          | A_92_P041111                 | no             |                                            |                                            | 1                              |
| GRMZM2G168886 | <i>apc2</i>        |                       | TC286503             |                          | A_92_P012604                 | yes            | <b>-0.504080092</b>                        | <b>-0.710388925</b>                        | 1                              |
| GRMZM2G147603 | <i>apc6;1</i>      |                       | TC283416             | B4FWL0                   | A_92_P002299                 | no             |                                            |                                            | 1                              |
| GRMZM2G166684 | <i>apc6;2</i>      |                       | CO454987             |                          | A_92_P013238                 | yes            | <b>-1.507805192</b>                        | <b>-1.567607508</b>                        | 1                              |
| GRMZM2G089296 | <i>apc7</i>        |                       | TC306721             |                          | A_92_P021833                 | yes            | <b>-1.059457833</b>                        | <b>-1.100621958</b>                        | 1                              |
| GRMZM2G054247 | <i>apc10</i>       |                       | TC311895             | B6T5J2                   | A_92_P000813                 | yes            | <b>-0.7096533</b>                          | <b>-0.649567683</b>                        | 1                              |
| GRMZM2G162356 | <i>apc11</i>       |                       | TC298221             | B6TKR6                   | A_92_P017143                 | yes            | <b>-1.1472785</b>                          | <b>-1.407176083</b>                        | 1                              |
| GRMZM2G170591 | <i>cdc23/A pc8</i> |                       | TC313616             | C4J4C0<br>B6SL38         | A_92_P003265                 | yes            | <b>-1.0721</b>                             | <b>-1.1293228</b>                          | 1                              |
| GRMZM2G063192 | <i>cdc20</i>       |                       | Al612495             | B6U240                   | A_92_P008432                 | yes            | <b>-3.052313992</b>                        | <b>-3.164055758</b>                        | 1                              |
| GRMZM2G011520 | <i>cdc25</i>       |                       | TC300846             | B6TQK1                   | A_92_P022295                 | yes            | <b>0.193294458</b>                         | <b>1.1379215</b>                           | 2                              |
| GRMZM2G008327 | <i>cdka1;1</i>     | <i>Cdc2Zma</i>        | TC292976<br>TC299222 | P23111                   | A_92_P026243<br>A_92_P004318 | yes<br>yes     | <b>-0.117478458</b><br><b>0.429979533</b>  | <b>-1.001422758</b><br><b>0.465050175</b>  | 2                              |
| GRMZM2G174596 | <i>cdka2;1</i>     |                       | TC292977             | D8L819                   | A_92_P008472                 | yes            | <b>-1.467583108</b>                        | <b>-2.143914808</b>                        | 2                              |
| GRMZM2G495626 | <i>cdkb1;1</i>     |                       | TC287283             | B4FWP9                   | A_92_P031231                 | yes            | <b>-2.354959075</b>                        | <b>-2.656077792</b>                        | 2                              |
| GRMZM2G070115 | <i>cdkb2;1</i>     |                       | TC311057             | C5Z786                   | A_92_P028552                 | no             |                                            |                                            | 2                              |
| GRMZM2G019267 | <i>cdkc2</i>       |                       | TC304893             | B4F9F3                   | A_92_P012950                 | yes            | <b>-0.174549233</b>                        | <b>-0.255549058</b>                        | 2                              |
| GRMZM2G149286 | <i>cdkd1</i>       |                       | TC281529             | B4FQK6                   | A_92_P025853                 | yes            | <b>-0.171294083</b>                        | <b>-0.090427042</b>                        | 2                              |
| GRMZM2G166771 | <i>cdke1</i>       |                       | TC279290             | B6TV49                   | A_92_P006921                 | no             |                                            |                                            | 2                              |
| GRMZM2G458799 | <i>csk1</i>        |                       | TC292250             |                          | A_92_P013788                 | yes            | <b>-2.621892458</b>                        | <b>-3.164654208</b>                        | 2                              |
| GRMZM2G038485 | <i>cks2</i>        |                       | TC312708             | B6SLG7                   | A_92_P022467                 | yes            | <b>-0.051676692</b>                        | <b>-0.132153567</b>                        | 2                              |
| no seq        | <i>cyca1;1</i>     | <i>cyclIzm</i>        | TC286394             | Q41732                   | A_92_P031387                 | yes            | <b>-3.271668908</b>                        | <b>-3.346761583</b>                        | 2                              |
| GRMZM2G007071 | <i>cyca1;2</i>     | <i>cycZm2w</i>        |                      | Q43693                   | not on the array             |                |                                            |                                            | 2                              |
| GRMZM2G017081 | <i>cyca2</i>       |                       | TC296008<br>TC313381 | C0HG87                   | A_92_P018228<br>A_92_P009756 | yes<br>yes     | <b>-0.931325742</b><br><b>-1.903091842</b> | <b>-0.778075267</b><br><b>-2.084325633</b> | 3                              |
| GRMZM2G060690 | <i>cyca3;1</i>     |                       | CD447837             | B6SKE9                   | not on the array             |                |                                            |                                            | 2                              |
| no seq        | <i>cyca3;2</i>     |                       | TC292456             |                          | not on the array             |                |                                            |                                            | 2                              |
| GRMZM2G363437 | <i>cyca3;3</i>     |                       | TC298919             | B4FJ13                   | A_92_P013164                 | no             |                                            |                                            | 2                              |
| no seq        | <i>cyca3;4</i>     |                       | TC298903             |                          | not on the array             |                |                                            |                                            | 2                              |
| GRMZM2G310115 | <i>cycb1;1</i>     | <i>cyclazm</i>        | TC299155             | Q41734                   | A_92_P007960                 | yes            | <b>-1.865066317</b>                        | <b>-1.736511725</b>                        | 2                              |
| GRMZM2G034647 | <i>cycb1;2</i>     | <i>cyclbzm</i>        | TC288893             | Q41733                   | A_92_P034339                 | yes            | <b>-1.196039983</b>                        | <b>-1.079251292</b>                        | 2                              |
| GRMZM2G005619 | <i>cycb1;3</i>     | <i>cycZme1</i>        | TC295005             | P93646                   | A_92_P027581                 | yes            | <b>-1.496771358</b>                        | <b>-1.606615092</b>                        | 2                              |
| GRMZM2G073671 | <i>cycb2;1</i>     | <i>cyclIzm</i>        | TC311432             | Q41731                   | A_92_P019388                 | yes            | <b>-2.198124142</b>                        | <b>-2.42463425</b>                         | 2                              |
| GRMZM2G138886 | <i>cycb2;2</i>     |                       | TC300622             | C0P7P1                   | A_92_P009394                 | no             |                                            |                                            | 2                              |
| GRMZM2G476685 | <i>cycd1;1</i>     |                       | TC284350<br>TC308600 | C0PDU6                   | A_92_P022470<br>A_92_P021047 | no<br>yes      |                                            |                                            | 2                              |
| GRMZM2G140633 | <i>cycd1;2</i>     | <i>Cyclin delta-2</i> | TC306119             | B6TJ83                   | A_92_P004507                 | yes            | <b>-1.773628525</b>                        | <b>-2.27767225</b>                         | 3                              |
| GRMZM2G075117 | <i>cycd2;1</i>     | <i>CYCD2</i>          | TC304897<br>TC304890 | Q8S524<br>Q8S524         | A_92_P026759<br>A_92_P016104 | yes<br>yes     | <b>0.110775708</b><br><b>0.1238227</b>     | <b>-0.341425825</b><br><b>-0.312027575</b> | 2                              |
| GRMZM2G133414 | <i>cycd4;1</i>     | <i>CYCD2;2, CYCD4</i> | TC306118             | Q8S522<br>B8A1Q3         | A_92_P012291                 | yes            | <b>-1.4858</b>                             | <b>-2.7197073</b>                          | 2                              |
| GRMZM2G178229 | <i>cycd4;2</i>     |                       | TC290220             | Q8S521                   | A_92_P018225                 | no             |                                            |                                            | 2                              |
| GRMZM2G006721 | <i>cycd5;1</i>     | <i>CYCD1</i>          | TC301115             | Q8S523                   | A_92_P038772                 | yes            | <b>-0.82457225</b>                         | <b>-1.269019125</b>                        | 2                              |
| GRMZM2G047637 | <i>cycd5;2</i>     |                       | TC289521             | C4J362                   | A_92_P041431                 | no             |                                            |                                            | 2                              |
| GRMZM2G050933 | <i>cycd6</i>       |                       | TC291551             | B6TAD6                   | A_92_P022300                 | yes            | <b>0.213735167</b>                         | <b>-0.795834175</b>                        | 1                              |
| GRMZM2G361662 | <i>cych</i>        |                       | TC282470             | B4G114                   | A_92_P034633                 | no             |                                            |                                            | 2                              |
| GRMZM2G361659 | <i>del1</i>        |                       | TC295278             | C0HFS9                   | A_92_P002096                 | no             |                                            |                                            | 2                              |
| GRMZM2G060000 | <i>del2</i>        |                       | TC306241             | C5Z7K6                   | A_92_P001624                 | yes            | <b>-0.808996383</b>                        | <b>-0.8768665</b>                          | 2                              |
| GRMZM2G462623 | <i>dpa</i>         |                       | BE511883             | C5XGP7                   | A_92_P031704                 | no             |                                            |                                            | 2                              |
| GRMZM2G139024 | <i>dpb</i>         |                       | TC301910             | B4FHH8                   | A_92_P020522                 | no             |                                            |                                            | 2                              |
| no seq        | <i>dpc</i>         |                       | TC312155             |                          | not on the array             |                |                                            |                                            | 2                              |
| GRMZM2G086072 | <i>dpd</i>         |                       | TC312156             | B6TKJ8                   | A_92_P001200                 | yes            | <b>-1.144267608</b>                        | <b>-1.784398208</b>                        | 2                              |
| GRMZM2G050590 | <i>e2f</i>         |                       | TC309263             | C0P8W8                   | A_92_P010968                 | no             |                                            |                                            | 2                              |
| GRMZM2G116885 | <i>krp1</i>        |                       |                      | Q52PU9                   | not on the array             |                |                                            |                                            | 2                              |
| GRMZM2G101613 | <i>krp2</i>        | <i>cdki2</i>          | TC297785             | B6TIJ9<br>Q52PU8         | A_92_P001257                 | yes            | <b>2.46915</b>                             | <b>1.23848373</b>                          | 2                              |
| GRMZM2G358931 | <i>krp3</i>        |                       | TC306015             | B4FG11                   | A_92_P020763                 | yes            | <b>-1.866751292</b>                        | <b>-1.333209808</b>                        | 2                              |
| GRMZM2G037926 | <i>krp4</i>        |                       | TC301833             | C0P5I7                   | A_92_P036889                 | yes            | <b>-0.063066883</b>                        | <b>0.210832267</b>                         | 2                              |
| GRMZM2G162445 | <i>mcm3</i>        |                       | TC293332             | Q9SX02                   | A_92_P002202                 | yes            | <b>-2.109759167</b>                        | <b>-2.2289333</b>                          | 1                              |
| GRMZM2G100639 | <i>mcm3;2</i>      |                       | TC293331             | Q9SX04                   | A_92_P030312                 | yes            | <b>-2.347820525</b>                        | <b>-2.521074542</b>                        | 1                              |

|                                                                                                                                                                                                                                                                                                  |               |              |          |        |              |     |              |              |   |
|--------------------------------------------------------------------------------------------------------------------------------------------------------------------------------------------------------------------------------------------------------------------------------------------------|---------------|--------------|----------|--------|--------------|-----|--------------|--------------|---|
| GRMZM2G066101                                                                                                                                                                                                                                                                                    | <i>mcm4;1</i> |              | TC311506 | B7ZVV7 | A_92_P011634 | yes | -1.997177717 | -2.372373575 | 1 |
| GRMZM2G327032                                                                                                                                                                                                                                                                                    | <i>mcm4;2</i> |              | TC311507 | C0PDH6 | A_92_P011265 | yes | -2.076762692 | -2.350265817 | 1 |
| GRMZM2G450055                                                                                                                                                                                                                                                                                    | <i>mcm5</i>   |              | TC285664 | C0HEP3 | A_92_P039239 | yes | -2.23014045  | -2.616655892 | 1 |
| GRMZM2G021069                                                                                                                                                                                                                                                                                    | <i>mcm6</i>   |              | TC298385 | Q5I285 | A_92_P040623 | yes | -2.214225608 | -1.866520958 | 1 |
| GRMZM2G065205                                                                                                                                                                                                                                                                                    | <i>mcm7</i>   |              | TC285635 | C0HFI8 | A_92_P038901 | yes | -2.138947442 | -2.30942825  | 1 |
| GRMZM2G133819                                                                                                                                                                                                                                                                                    | <i>mcm10</i>  |              | TC289444 | B6TE84 | A_92_P010931 | yes | 0.57351515   | 0.742147967  | 1 |
| GRMZM2G033828                                                                                                                                                                                                                                                                                    | <i>rbr1;1</i> | <i>RBR3</i>  | TC282517 | Q3LXA7 | A_92_P007012 | yes | -2.282670625 | -2.525713258 | 2 |
| GRMZM2G003043                                                                                                                                                                                                                                                                                    | <i>rbr2;1</i> | <i>RBR1</i>  |          | O22344 |              |     |              |              | 2 |
|                                                                                                                                                                                                                                                                                                  |               | <i>RBR1</i>  | TC281205 | Q9LXX9 | A_92_P017970 | yes | 0.017739533  | 0.213705775  |   |
|                                                                                                                                                                                                                                                                                                  |               | <i>RB1</i>   |          | Q7DLV4 |              |     |              |              |   |
|                                                                                                                                                                                                                                                                                                  |               | <i>ZmRB</i>  |          | Q41763 |              |     |              |              |   |
| GRMZM2G153150                                                                                                                                                                                                                                                                                    | <i>rbr2;2</i> | <i>RBR2</i>  | TC281207 | Q8H0J6 | A_92_P029071 | yes | -0.075069733 | 0.084041992  | 2 |
|                                                                                                                                                                                                                                                                                                  |               | <i>RBR2a</i> |          | O22346 |              |     |              |              |   |
|                                                                                                                                                                                                                                                                                                  |               | <i>RBR2b</i> |          | O22345 |              |     |              |              |   |
|                                                                                                                                                                                                                                                                                                  |               |              |          |        |              |     |              |              |   |
| GRMZM5G878541                                                                                                                                                                                                                                                                                    | <i>wee1</i>   |              | TC294770 | Q9SPZ8 | A_92_P023756 | yes | -0.66306805  | -0.807602108 | 2 |
| 1 Annotated by combining different sources as <a href="http://www.maizesequence.org">http://www.maizesequence.org</a> , UNIPROT and <a href="http://bioinformatics.psb.ugent.be/plaza/">http://bioinformatics.psb.ugent.be/plaza/</a> ;2 Rymen <i>et al</i> ,2007;3 Kakumanu <i>et al</i> , 2012 |               |              |          |        |              |     |              |              |   |

**Table S2.** An Overview of Expression Levels of Genes, Coding Different Isoforms of the Key Redox Enzymes in Response to Mild and Severe Drought Stress in the Different Positions of the Leaf Growth Zone. A two-way ANOVA statistical test was applied to compare the gene expression in the three zones of the leaf (meristem, elongation and mature zone), and the three treatments (control, mild stress, severe stress) and the significant changes are marked in bold.

| ZM Gene ID    | Agilent ID       | EST Accession Number | Above BG level | Name                                                | Log2 FC mild stress | Log2 FC severe stress | log2FC elongation-meristem | log2FC mature-meristem |
|---------------|------------------|----------------------|----------------|-----------------------------------------------------|---------------------|-----------------------|----------------------------|------------------------|
| <b>CAT</b>    |                  |                      |                |                                                     |                     |                       |                            |                        |
| GRMZM2G088212 | A_92_P035919     | TC292697             | yes            | <i>cat1</i>                                         | <b>0.5710345</b>    | <b>0.962720625</b>    | -0.114605625               | -0.181144875           |
| GRMZM2G090568 | A_92_P010403     | TC312061             | yes            | <i>cat2</i>                                         | <b>0.2504552</b>    | <b>3.963655892</b>    | -0.650855033               | -0.292111025           |
| GRMZM2G079348 | A_92_P019193     | TC309409             | yes            | <i>cat3</i>                                         | <b>-0.921432633</b> | <b>-1.060040358</b>   | -0.095424975               | 0.093026933            |
| <b>SOD</b>    |                  |                      |                |                                                     |                     |                       |                            |                        |
| GRMZM2G042080 | A_92_P016286     | TC295662             | yes            | <i>iron superoxide dismutase</i>                    | <b>1.236105333</b>  | <b>1.4377495</b>      | 0.000627208                | -0.36237275            |
|               | A_92_P035479     | TC307686             | yes            |                                                     | <b>1.102884533</b>  | <b>1.340133683</b>    | <b>-0.199645675</b>        | <b>-0.810436708</b>    |
| GRMZM5G864424 | A_92_P009291     | TC312005             | yes            | <i>iron superoxide dismutase 3</i>                  | <b>1.274814</b>     | <b>1.677618125</b>    | 0.143398833                | -0.139173333           |
| GRMZM2G059991 | A_92_P019990     | CD956453             | no             | <i>Superoxide dismutase [Mn] 3.1, mitochondrial</i> |                     |                       |                            |                        |
| GRMZM2G124455 | A_92_P027370     | TC301296             | yes            | <i>Superoxide dismutase [Mn] 3.4, mitochondrial</i> | <b>-0.177955458</b> | <b>-0.23672975</b>    | <b>0.243224625</b>         | <b>0.052382417</b>     |
| GRMZM5G891739 | A_92_P037327     | TC286793             | yes            | <i>Superoxide dismutase [Cu-Zn]</i>                 | <b>0.945944517</b>  | <b>2.319420658</b>    | -0.196884758               | -0.441819842           |
| GRMZM2G106928 | A_92_P007498     | CO443266             | yes            | <i>Superoxide dismutase [Cu-Zn]</i>                 | <b>1.378868875</b>  | <b>2.117176667</b>    | -0.15551075                | -0.345029333           |
| GRMZM2G025992 | A_92_P007360     | CB886186             | no             | <i>Superoxide dismutase [Cu-Zn] 2</i>               |                     |                       |                            |                        |
| GRMZM2G169890 | A_92_P013190     | TC304922             | no             | <i>Superoxide dismutase [Cu-Zn] 4A</i>              |                     |                       |                            |                        |
| GRMZM2G058522 | A_92_P040075     | TC299523             | no             | <i>Superoxide dismutase [Cu-Zn] 4AP</i>             |                     |                       |                            |                        |
| <b>NOX</b>    |                  |                      |                |                                                     |                     |                       |                            |                        |
| GRMZM2G426953 | not on the array |                      |                | <i>Zmrbob A</i>                                     |                     |                       |                            |                        |
|               | A_92_P031602     | TC311766             | yes            |                                                     | <b>0.642347508</b>  | <b>1.191182208</b>    | -0.239258867               | -0.219641942           |
| GRMZM2G138152 | A_92_P019915     | TC282008             | yes            | <i>Zmrbob B</i>                                     | <b>0.611732917</b>  | <b>1.135101075</b>    | -0.006003992               | 0.111273283            |
|               | not on the array |                      |                |                                                     |                     |                       |                            |                        |
| GRMZM2G431506 | not on the array |                      |                |                                                     |                     |                       |                            |                        |
| GRMZM2G022547 | A_92_P035351     | CF036497             | yes            | <i>respiratory burst oxidase protein b</i>          | <b>0.384864467</b>  | <b>0.278254392</b>    | 0.000399783                | 0.0096326              |
|               | A_92_P017675     | DR818840             | yes            |                                                     | <b>0.419170917</b>  | <b>0.049476467</b>    | 0.137440742                | 0.377926242            |
| GRMZM2G034896 | A_92_P027911     | TC306238             | yes            | <i>respiratory burst oxidase-like protein B2</i>    | 0.154802917         | 0.367331117           | 0.107933642                | 0.316032492            |
| GRMZM2G043435 | A_92_P039989     | TC281675             | no             | <i>Zmrbob C</i>                                     |                     |                       |                            |                        |
|               | A_92_P024538     | TC306864             | no             |                                                     |                     |                       |                            |                        |
|               | A_92_P001607     | CO448228             | no             |                                                     |                     |                       |                            |                        |
| GRMZM2G441541 | A_92_P011018     | CA452791             | no             | <i>Zmrbob D</i>                                     |                     |                       |                            |                        |
|               | A_92_P007144     | TC294962             | no             |                                                     |                     |                       |                            |                        |
| <b>POX</b>    |                  |                      |                |                                                     |                     |                       |                            |                        |
| GRMZM2G104394 | A_92_P008062     | TC295344             | yes            | <i>pmpox1</i>                                       | <b>-0.288150792</b> | <b>-1.100907267</b>   | 0.1572933                  | 0.017432467            |
| GRMZM2G104109 | A_92_P031214     | BM500461             | yes            | <i>peroxidase1</i>                                  | <b>0.316913533</b>  | <b>0.274578967</b>    | -0.036847142               | -0.097476508           |
| GRMZM2G126261 | A_92_P022169     | TC306090             | yes            | <i>pmpox3-1</i>                                     | <b>0.324803408</b>  | <b>2.4549677</b>      | 0.363149925                | -0.415227792           |
| GRMZM2G133475 | A_92_P019188     | TC302528             | yes            | <i>pmpox3-2</i>                                     | <b>1.691313725</b>  | <b>3.569904925</b>    | -0.7038954                 | -0.10656895            |
| GRMZM2G080689 | A_92_P009418     | TC294882             | yes            | <i>peroxidase52</i>                                 | <b>0.107482783</b>  | <b>-0.6200205</b>     | <b>0.552242242</b>         | <b>0.649995417</b>     |
| GRMZM2G382379 | A_92_P010677     | CO442337             | yes            | <i>peroxidase68</i>                                 | 0.204101792         | 0.028471725           | 0.178375375                | 0.704254317            |
| <b>LOX</b>    |                  |                      |                |                                                     |                     |                       |                            |                        |
| GRMZM2G156861 | A_92_P015840     | BE051732             | yes            | <i>lox2</i>                                         | <b>1.746592683</b>  | <b>2.533807342</b>    | <b>0.21244645</b>          | <b>0.7784179</b>       |
|               | A_92_P017031     | TC299182             | yes            |                                                     | <b>3.203277475</b>  | <b>3.5925821</b>      | -0.241316333               | 0.889223458            |
|               | A_92_P015218     | TC299191             | yes            |                                                     | <b>2.020845833</b>  | <b>2.580663333</b>    | <b>0.127247917</b>         | <b>1.07472375</b>      |
| GRMZM2G109056 | A_92_P007859     | TC299188             | yes            | <i>lox4</i>                                         | -0.411169917        | -0.344087708          | 0.474599917                | 0.400542083            |
| GRMZM2G102760 | A_92_P024692     | TC299185             | yes            | <i>lox5</i>                                         | -0.051442042        | 0.241035542           | -0.288532183               | 0.042697458            |
| GRMZM2G040095 | A_92_P018509     | TC290587             | yes            | <i>lox6</i>                                         | <b>0.474666817</b>  | <b>0.729746133</b>    | <b>0.003948208</b>         | <b>0.396724317</b>     |
|               | A_92_P007454     | TC294707             | yes            |                                                     | <b>0.826932775</b>  | <b>1.936698392</b>    | -0.095991492               | 0.183463533            |
| GRMZM2G015419 | A_92_P041145     | TC298883             | yes            | <i>lox10</i>                                        | <b>-0.08685205</b>  | <b>2.109618167</b>    | <b>-0.105175758</b>        | <b>0.823767425</b>     |
| GRMZM2G009479 | A_92_P018298     | TC298881             | yes            | <i>lox11</i>                                        | <b>-2.486035833</b> | <b>-1.812820158</b>   | -0.277310692               | 0.000970775            |

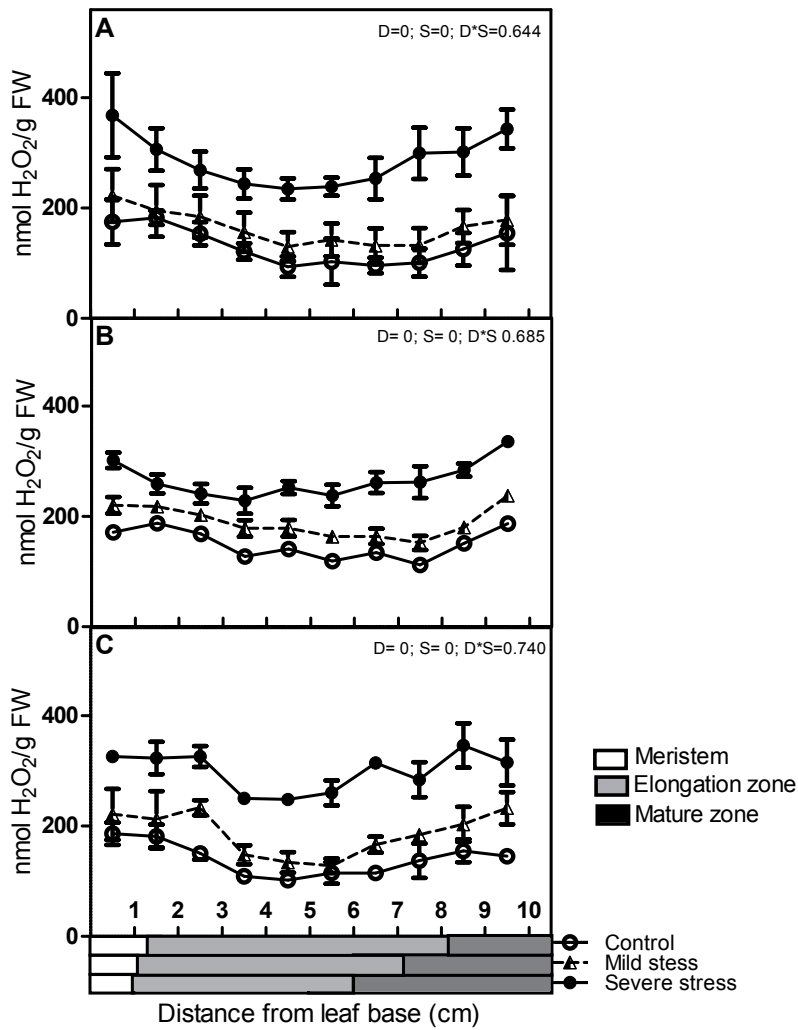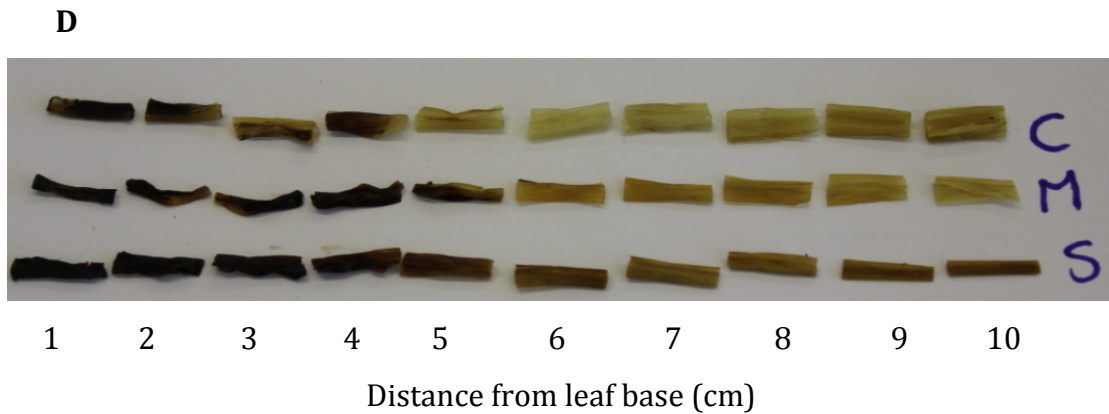

**Figure S5.** Comparison Between Different Methods of Determination of H<sub>2</sub>O<sub>2</sub> Concentration Across the Growth Zone of Maize Leaves, Subjected to Mild and Severe Drought Stress.



**(A)** Extraction in phosphate buffer (pH=6.5), containing catalase inhibitor (1 mM hydroxylamine) followed by quantification with xylenol orange reagent. **(B)** Extraction in 5% TCA, followed by quantification with xylenol orange reagent. **(C)** Extraction in phosphate buffer (pH=6.5), containing catalase inhibitor (1 mM hydroxylamine), followed by a quantification with the Amplex red hydrogen peroxide/peroxidase assay (Molecular Probes). **(D)** H<sub>2</sub>O<sub>2</sub> localization through 3,3'-diaminobenzidine (DAB) staining of the growth zone of maize leaves, from control (C), mildly (M) and severely (S) stressed plants. H<sub>2</sub>O<sub>2</sub> content measurements by extracting H<sub>2</sub>O<sub>2</sub> in 5% TCA. A two-way ANOVA was used as a statistical test and p values for the two factors, drought (D) and segment (S), as well as the interaction between them, are present on each graph panel. Data are averages +/- SE (n=5). The length of each developmental zone (meristem, elongation, mature) in each treatment (control, mild, and severe stress) is marked on the x axes of the graphs according to Figure S2.

## References

- Kakumanu A, Ambavaram MMR, Klumas C, Krishnan A, Batlang U, Myers E, Grene R, Pereira A** (2012) Effects of Drought on Gene Expression in Maize Reproductive and Leaf Meristem Tissue Revealed by RNA-Seq. *Plant Physiology* **160**: 846-867
- Rymen B, Fiorani F, Kartal F, Vandepoele K, Inze D, Beemster GTS** (2007) Cold nights impair leaf growth and cell cycle progression in maize through transcriptional changes of cell cycle genes. *Plant Physiology* **143**: 1429-1438
